# Supplementary material
Source: HighWire-hosted journal article supplement (https://www.cmaj.ca/highwire/filestream/59340/field_highwire_adjunct_files/4/141372-res-5-at.pdf)
Supplement: 141372-res-5-at.pdf [file 141372-res-5-at.pdf]

| <b>Appendix 5 (part 1 of 2): Multivariable Cox model for readmission with myocardial infarction*</b> |                       |         |
|------------------------------------------------------------------------------------------------------|-----------------------|---------|
| Covariate                                                                                            | Hazard ratio (95% CI) | p value |
| <b>Revascularization-to-medical therapy ratio</b>                                                    |                       |         |
| Low                                                                                                  | 1.00 (ref)            |         |
| High                                                                                                 | 1.03 (0.84-1.26)      | 0.8     |
| Medium                                                                                               | 0.90 (0.72-1.13)      | 0.4     |
| <b>Treatment</b>                                                                                     |                       |         |
| Medical therapy                                                                                      | 1.00 (ref)            |         |
| PCI                                                                                                  | 0.57 (0.39-0.84)      | 0.004   |
| CABG                                                                                                 | 2.04 (1.36-3.08)      | 0.001   |
| <b>Patient</b>                                                                                       |                       |         |
| <i>Demographic</i>                                                                                   |                       |         |
| Age, yr (per additional yr)                                                                          | 1.01 (1.00-1.01)      | 0.002   |
| Male sex (v. female)                                                                                 | 0.93 (0.87-1.00)      | 0.04    |
| Rural residence (v. urban)                                                                           | 0.97 (0.88-1.07)      | 0.5     |
| Income quintile                                                                                      |                       |         |
| 1 (lowest)                                                                                           | 1.25 (1.12-1.40)      | < 0.001 |
| 2                                                                                                    | 1.11 (1.03-1.19)      | 0.006   |
| 3                                                                                                    | 1.07 (0.98-1.17)      | 0.1     |
| 4                                                                                                    | 0.99 (0.88-1.11)      | 0.8     |
| 5 (highest)                                                                                          | 1.00 (ref)            |         |
| <i>Medical comorbidities</i>                                                                         |                       |         |
| Peripheral vascular disease (v. no disease)                                                          | 1.35 (1.26-1.44)      | < 0.001 |
| Prior MI (v. no prior MI)                                                                            | 1.96 (1.79-2.14)      | < 0.001 |
| COPD (v. no COPD)                                                                                    | 1.13 (1.04-1.23)      | 0.004   |
| Charlson comorbidity score (per additional point)                                                    | 1.20 (1.16-1.24)      | < 0.001 |
| <i>Cardiac risk factors</i>                                                                          |                       |         |
| Diabetes (v. no diabetes)                                                                            | 0.99 (0.88-1.10)      | 0.8     |
| Hypertension (v. no hypertension)                                                                    | 1.28 (1.09-1.49)      | 0.002   |
| Hyperlipidemia (v. no hyperlipidemia)                                                                | 0.94 (0.85-1.04)      | 0.3     |
| History of smoking (v. never smoked)                                                                 | 1.00 (0.92-1.09)      | 0.9     |
| <i>Cardiac status/testing</i>                                                                        |                       |         |
| Native stenosis (v. nonsignificant stenosis)                                                         |                       |         |
| Left main coronary artery                                                                            | 1.09 (0.96-1.24)      | 0.2     |
| Proximal left anterior descending coronary artery                                                    | 1.04 (0.95-1.14)      | 0.4     |
| Mid or distal left anterior descending coronary artery                                               | 1.11 (1.01-1.22)      | 0.04    |
| Circumflex artery                                                                                    | 1.15 (1.00-1.32)      | 0.04    |
| Right coronary artery                                                                                | 1.15 (1.05-1.27)      | 0.003   |
| Prior CABG (v. no prior CABG)                                                                        | 1.23 (1.15-1.32)      | < 0.001 |
| Vessel disease                                                                                       |                       |         |
| 1 vessel                                                                                             | 1.00 (ref)            |         |
| 2 vessel                                                                                             | 0.97 (0.85-1.10)      | 0.6     |
| 3 vessel                                                                                             | 1.01 (0.82-1.24)      | 0.9     |

**Appendix 5 (part 2 of 2): Multivariable Cox model for readmission with myocardial infarction\***

| Covariate                                                         | Hazard ratio (95% CI) | p value |
|-------------------------------------------------------------------|-----------------------|---------|
| <b>Left ventricular function</b>                                  |                       |         |
| ≥ 50%                                                             | 1.00 (ref)            |         |
| ≤ 34%                                                             | 1.50 (1.35-1.68)      | < 0.001 |
| 35%–49%                                                           | 1.27 (1.17-1.37)      | < 0.001 |
| Not done                                                          | 1.12 (1.02-1.23)      | 0.02    |
| <b>Exercise ECG risk</b>                                          |                       |         |
| Low risk                                                          | 1.00 (ref)            |         |
| High risk                                                         | 1.00 (0.82-1.22)      | > 0.9   |
| Uninterpretable                                                   | 0.93 (0.78-1.10)      | 0.4     |
| Not done                                                          | 1.43 (1.28-1.60)      | < 0.001 |
| <b>Functional imaging risk</b>                                    |                       |         |
| Low risk                                                          | 1.00 (ref)            |         |
| High risk                                                         | 0.97 (0.87-1.08)      | 0.6     |
| Not done                                                          | 1.03 (0.94-1.13)      | 0.5     |
| <b>CCS class</b>                                                  |                       |         |
| 0                                                                 | 1.00 (ref)            |         |
| 1                                                                 | 0.94 (0.81-1.08)      | 0.3     |
| 2                                                                 | 1.02 (0.90-1.16)      | 0.8     |
| 3                                                                 | 1.07 (0.96-1.21)      | 0.2     |
| 4                                                                 | 1.18 (0.99-1.41)      | 0.07    |
| <b>Physician‡</b>                                                 |                       |         |
| Age, yr (per additional yr)                                       | 1.01 (1.00-1.03)      | 0.1     |
| Male (v. female)                                                  | 1.10 (0.83-1.44)      | 0.5     |
| Years since graduation (per additional yr)                        | 0.99 (0.98-1.01)      | 0.3     |
| Total consultations billed per year (per additional consultation) | 1.00 (1.00-1.00)      | 0.2     |
| Total visits billed per yr (per additional visit)                 | 1.00 (1.00-1.00)      | 0.3     |
| <b>Hospital factors</b>                                           |                       |         |
| Annual catheterization volume (per additional procedure)          | 1.00 (1.00-1.00)      | 0.009   |
| <b>Hospital type</b>                                              |                       |         |
| CABG, PCI and catheterization                                     | 1.00 (ref)            |         |
| Catheterization only                                              | 0.91 (0.78-1.05)      | 0.2     |
| PCI and catheterization only                                      | 1.05 (0.73-1.51)      | 0.8     |

Note: CABG = coronary artery bypass grafting, CCS = Canadian Cardiovascular Society, CI = confidence interval, COPD = chronic obstructive pulmonary disease, ECG = electrocardiogram, PCI = percutaneous coronary intervention, ref = reference group.  
 \*This model included a time-varying covariate for treatment. The cohort was allocated to the medical therapy category until time of revascularization (up to maximum of 90 d), at which point the revascularized patients were reallocated to the PCI or CABG category based on the first revascularization modality received.  
 †Significant stenosis ≥ 70% (≥ 50% in left main coronary artery).  
 ‡Procedural physician.
